# Supplementary figures and images for: Replication stress-inducing ELF3 upregulation promotes BRCA1-deficient breast tumorigenesis in luminal progenitors
Source: eLife journal article supplement (doi:10.7554/elife.89573), 2023-10-23

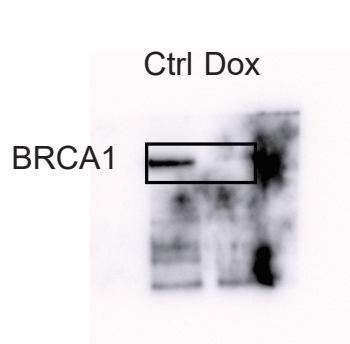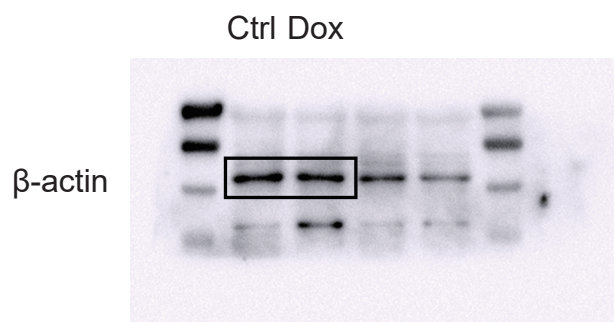

Supplement: fig1-figsupp1-data1 [file Figure 1 Supplement 1C.pdf › Figure 1 Supplement 1C.pdf]

Figure 3C

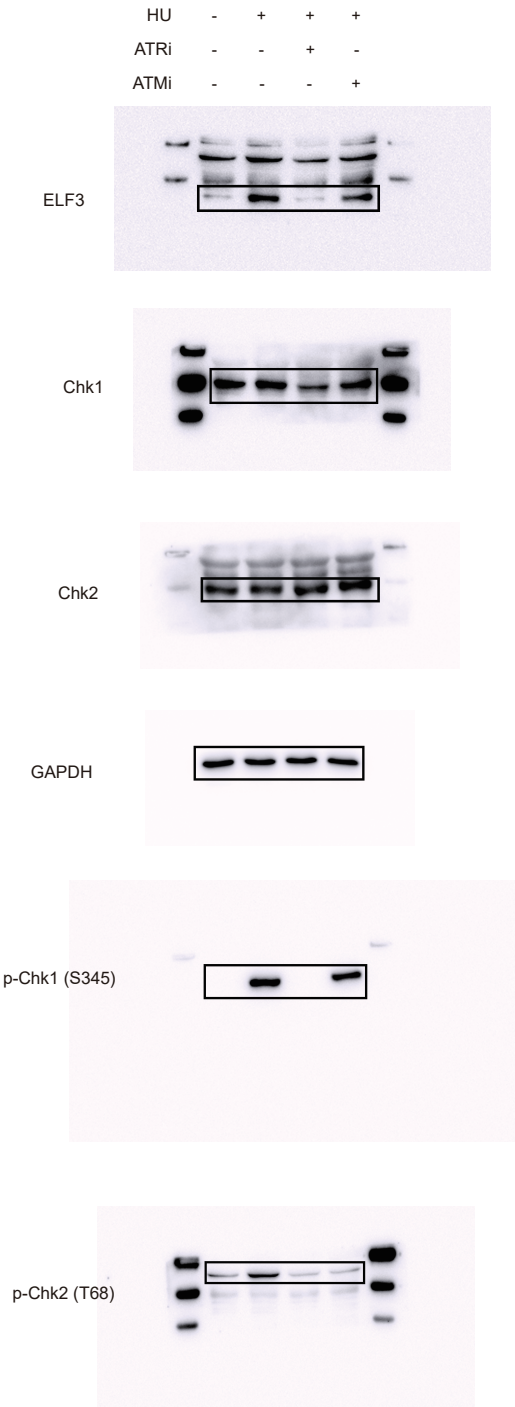

Figure 3D

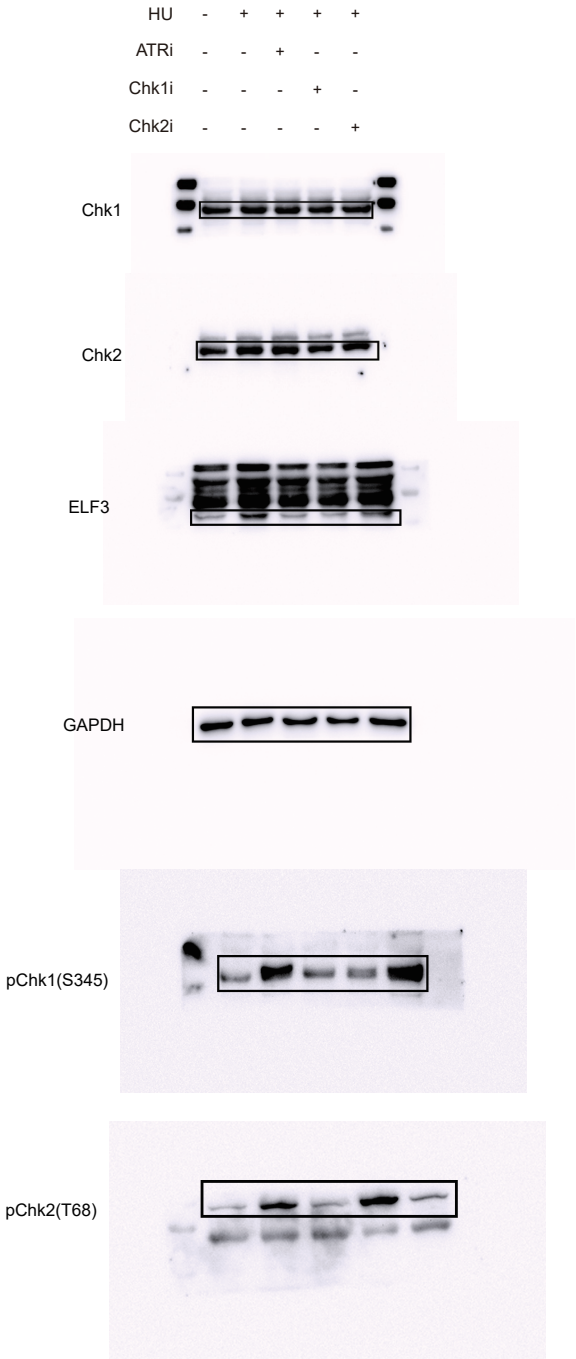

Figure 3E

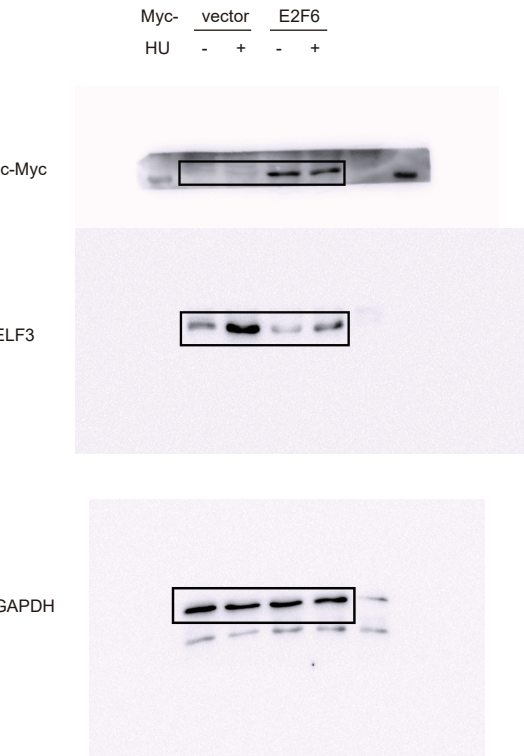

Figure 3L

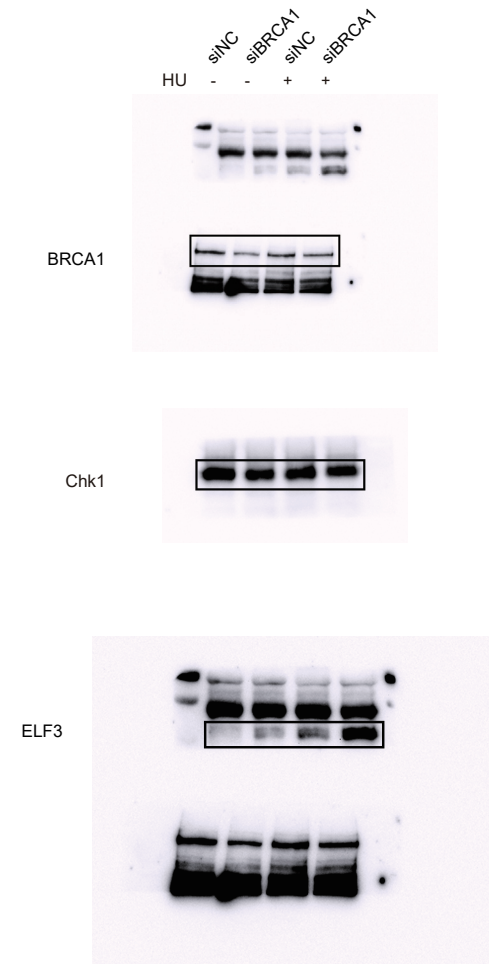

Figure 3H

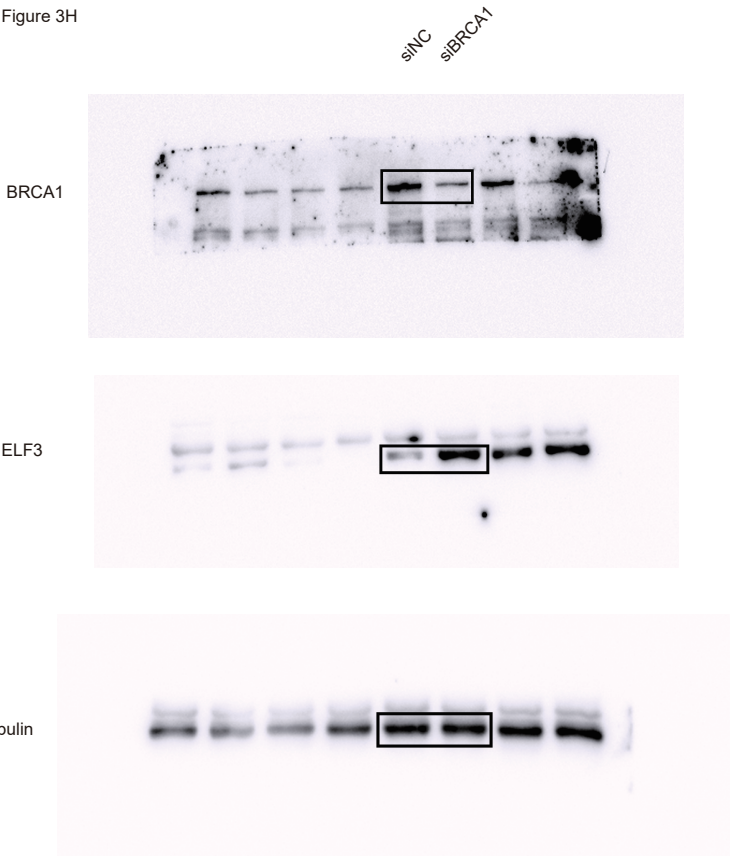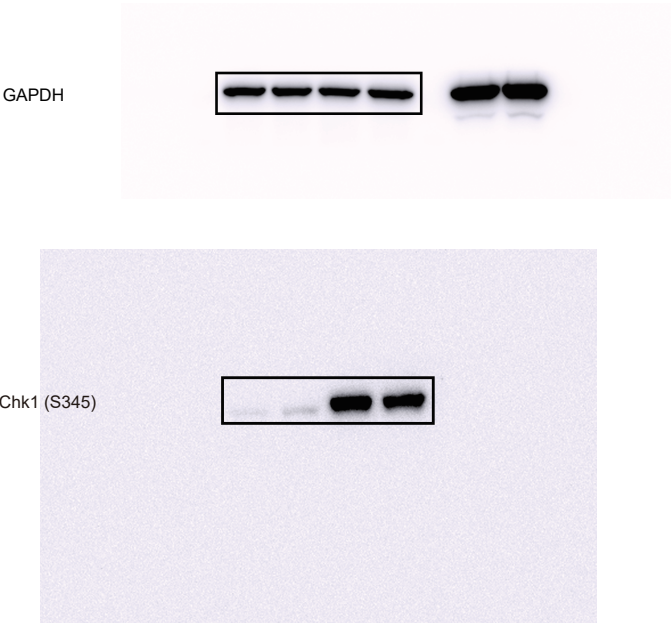

Supplement: fig3-data1 [file Figure 3-Source data.pdf › Figure 3-Source data.pdf]

Figure 4 Supplement 1A

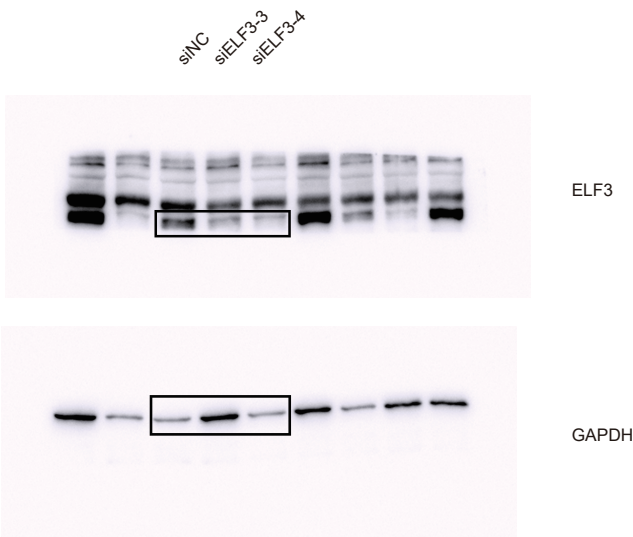

Figure 4 Supplement 1C

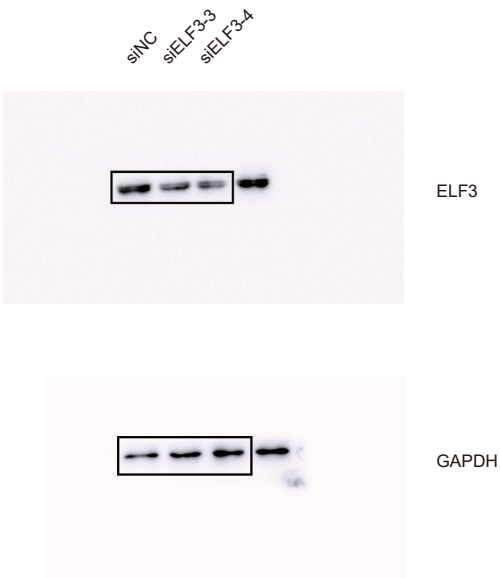

Figure 4 Supplement 1B

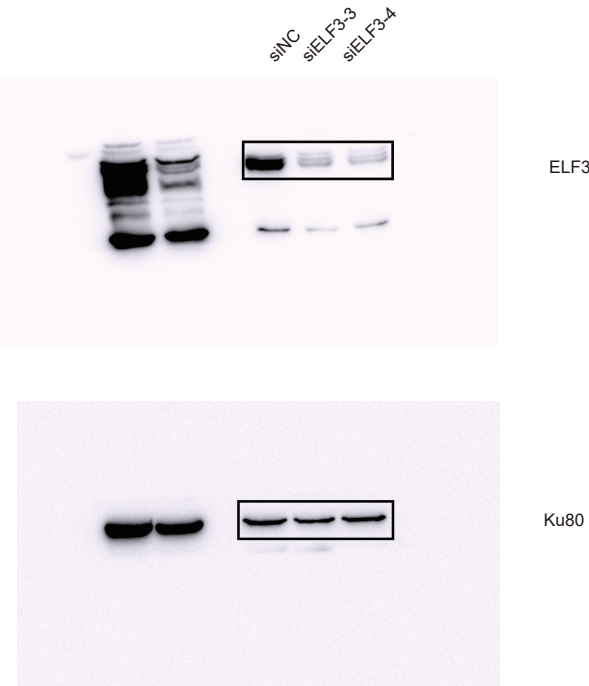

Figure 4 Supplement 1E

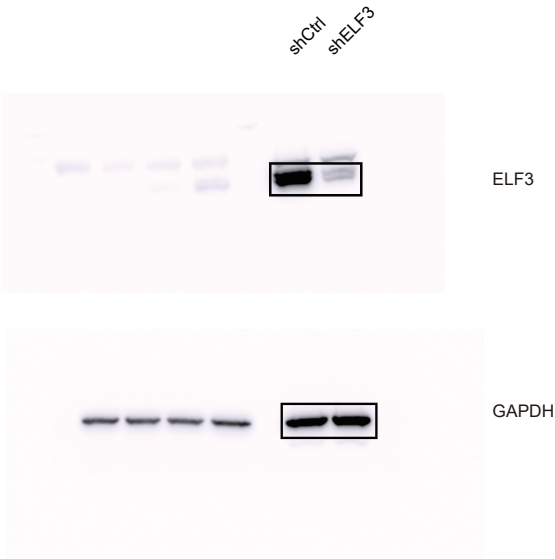

Supplement: fig4-figsupp1-data1 [file Figure 4 Supplement 1.pdf › Figure 4 Supplement 1.pdf]
